# Supplementary material
Source: Elsevier journal article supplement (https://www.sciencedirect.com/science/article/pii/S2530018020300469)
Supplement: mmc1 [file S2530018020300469:mmc1.docx]

Anexo 1. Cuestionario de Evaluación de Necesidades Sociosanitarias en pacientes con Intolerancia Hereditaria a la Fructosa.

| CONSENTIMIENTO INFORMADO |
| --- |
| **He leído o me han leído toda la información anterior sobre este estudio de investigación, incluyendo los procedimientos de la encuesta y confidencialidad y la probabilidad de algún beneficio para mí y la he entendido.**  **Reconozco que la información que yo provea es estrictamente confidencial y no será usada para ningún otro propósito fuera de los de este estudio sin mi consentimiento. He sido informado que la encuesta es anónima y que el registro que se guarda de las respuestas de la encuesta no contiene información que permita identificarme.**  **He sido informado de que puedo hacer preguntas sobre el proyecto en cualquier momento y que puedo retirarme del mismo cuando así lo decida, sin que esto acarree perjuicio alguno para mi persona.**  **Entiendo que de tener preguntas sobre mi participación en este estudio o si quiero información sobre los resultados puedo contactar con Elsa Izquierdo García en el teléfono 911918404 o a través del correo electrónico** [**elsa.izquierdo@salud.madrid.org**](mailto:elsa.izquierdo@salud.madrid.org)  1. ¿Ud. desea continuar con la encuesta después de haber leído todo lo anterior?  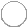 Lo entiendo y deseo participar en esta encuesta. 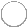 No deseo participar  En el caso de enviarlo en formato papel, por favor FECHAR Y FIRMAR y quedarse con una copia (una vez recibida la encuesta, esta hoja no se asociará al resto de la encuesta). |

| A) DATOS DE LA PERSONA QUE CONTESTA EL CUESTIONARIO |
| --- |
| **Por favor, responda a estas preguntas de la manera más precisa posible. Marque la opción que mejor refleje su opinión respecto a cada una de las preguntas. Sólo puede marcar una opción en cada pregunta, a no ser que se le indique lo contrario.**  **RECUERDE, SI SU FAMILIA TIENE VARIOS MIEMBROS AFECTADOS DE IHF, DEBE REALIZAR UNA ENCUESTA DIFERENTE POR CADA MIEMBRO AFECTADO DE IHF.**  2. Por favor, indique qué persona contesta el cuestionario:  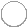 La persona con enfermedad rara por sus propios medios (mayor de 16 años)  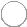 La persona con enfermedad rara con apoyo de un intérprete o un asistente (mayor de 16 años)  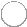 Un informante (familiar, tutor, cuidador, etc.) (para afectados menores de 16 años o con discapacidad) |

| B) DATOS DE LA PERSONA CON INTOLERANCIA HEREDITARIA A LA FRUCTOSA (IHF) |
| --- |
| **RECUERDE, SIEMPRE HAY QUE CONTESTAR CON LOS DATOS DE LA PERSONA CON IHF.**   1. Fecha de nacimiento de la persona con IHF   DD MM AAAA  Fecha / /   1. Sexo de la persona con IHF   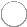 Mujer 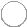 Varón   1. Nacionalidad de la persona con IHF   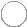 Española Otro (especifique):   1. Municipio de residencia actual      1. Provincia de residencia actual      1. ¿Dispone de un diagnóstico de IHF?   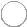 Sí, dispongo de un diagnóstico confirmado  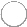 Dispongo de un diagnóstico, pero no está confirmado  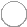 No dispongo de diagnóstico, pero estoy en proceso de conseguirlo (pase a la pregunta 11)  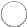 No dispongo de diagnóstico, ni posibilidades de conseguirlo (pase a la pregunta 11)  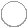 No sabe / No contesta |

| 9. Si dispone de un diagnóstico: indique el método con el que se le diagnosticó la enfermedad (puede marcar varias opciones). Si en años posteriores se han utilizado otros métodos diagnósticos especificarlo en comentarios. Por ejemplo: si se realizó el diagnóstico hace 20 años por biopsia hepática se marcará está opción, y se indicará en comentarios si en los últimos años se ha realizado la prueba genética)  Prueba genética (análisis de sangre) Biopsia hepática  Biopsia intestinal Sobrecarga de fructosa  Únicamente por los síntomas que padecía tras el consumo de fructosa No sabe/no contesta  Otro método de diagnóstico (especifique) u otros métodos diagnósticos posteriores    10. ¿Cuántos meses transcurrieron desde la aparición de los primeros síntomas, hasta la consecución del diagnóstico actual?  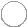 Menos de 6 meses (pase a la pregunta 12)  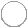 Entre 6 meses y un año (pase a la pregunta 12)  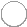 Entre 1 y 3 años  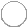 Entre 4 y 9 años  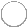 10 o más años  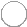 No sabe / No contesta |
| --- |

| 1. ¿Qué consecuencias ha experimentado por su retraso diagnóstico (o, en su caso, por no disponer del mismo)? (puede marcar varias opciones)   No recibir ningún apoyo ni tratamiento Haber recibido un tratamiento inadecuado Agravamiento de la enfermedad Necesidad de atención psicológica  No he experimentado ninguna consecuencia debida al retraso diagnóstico o actualmente lo desconozco  Otro (especifique)   1. Por favor, indique, en su caso, qué tipo de secuelas tiene debidas a la enfermedad (puede marcar varias opciones)   Discapacidad física (incluida motora y orgánica) Discapacidad intelectual  Discapacidad de la visión  Discapacidad de la audición Discapacidad por trastorno psiquiátrico  Actualmente no padezco secuelas debidas a la enfermedad  Otro (especifique) |
| --- |

| 1. ¿Tiene el certificado de reconocimiento del grado de discapacidad?   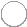 Sí  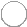 Lo he solicitado, pero está en proceso de tramitación (pase a la pregunta 15)  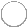 Lo he solicitado, pero me lo han denegado (grado menor de 33%) (pase a la pregunta 15) 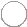 No lo poseo ni lo he solicitado) (pase a la pregunta 15)  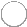 El afectado no posee edad suficiente para este reconocimiento) (pase a la pregunta 15) 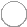 No sabe / No contesta (pase a la pregunta 15)   1. ¿Qué grado de discapacidad tiene valorado en su certificado oficial?   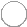 Entre 33 – 64%  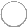 Entre 65 – 74% 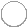 Mayor de 75 %  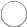 No sabe / No contesta  15. ¿Algún otro miembro de su familia está afectado por su misma enfermedad rara?  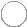 Sí, exactamente la misma enfermedad  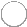 No  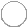 No sabe/no contesta |
| --- |

| 16.  Si hay algún otro miembro de la familia afectado por la misma enfermedad, indique el parentesco en relación a la persona IHF a la que se refiere durante toda la encuesta (Por ejemplo: si la encuesta se refiere a su hijo afectado de IHF, será el grado de parentesco de su hijo con respecto al resto de familiares) (puede marcar varias opciones):  Padre Madre  Hermanos (especificar el número de hermanos en comentarios) Hijos (especificar el número de hijos en comentarios)  Abuelos (especificar el número de abuelos en comentarios) Tíos (especificar el número de tíos en comentarios)  Sobrinos (especificar el número de sobrinos en comentarios) Primos (especificar el número de primos en comentarios)  Otro (especifique) |
| --- |

| C) ATENCIÓN SANITARIA |
| --- |
| **Las preguntas se refieren exclusivamente a la persona con IHF**  17. ¿Cree que recibe el tratamiento que precisa para su enfermedad?  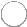 Sí, dispongo del tratamiento que preciso  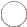 Dispongo de tratamiento, aunque no es el adecuado  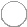 No dispongo del tratamiento o tratamientos que necesito (pase a la pregunta 20) 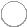 Actualmente no preciso tratamiento para mi enfermedad (pase a la pregunta 20) 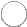 No sabe / No contesta (pase a la pregunta 20)  18. ¿Qué instancia o instancias sanitarias le prestan dicho tratamiento? (puede marcar varias opciones)  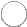 Sanidad pública (atención primaria, médico de cabecera) 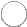 Sanidad pública, atención especializada  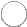 Especialistas privados (en España) 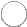 Especialistas en el extranjero  Otro (especifique):  19. Por favor, especifique el tipo de tratamiento que recibe de acuerdo a su duración (puede marcar varias opciones si está en tratamiento con varios medicamentos, especificar en comentarios)  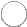 Es un tratamiento continuo de larga duración o permanente  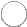 Es un tratamiento continuo, pero temporal (se prevé un momento de finalización)  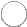 Es un tratamiento ocasional (sólo en momentos puntuales)  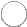 No sabe / No contesta  20. ¿Ha sido tratado alguna vez de un modo inadecuado por algún profesional sanitario, como consecuencia de su enfermedad? (Especificar la causa en comentarios) (puede marcar varias opciones)  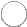 Sí, por falta de conocimientos sobre la enfermedad  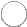 Sí, por otras causas relacionadas con la enfermedad (aspecto físico, dificultades de comunicación, comportamiento asociado a la enfermedad)  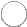 Sí, por causas no estrictamente relacionadas con la enfermedad (saturación, inseguridad, miedo, etc.)  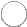 Sí, tanto por causas relacionadas con la enfermedad como por otras causas  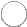 Por otras causas  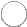 No, nunca  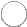 No sabe / No contesta  Comentarios (especifique la causa):  21. Indique las consultas médicas a las que ha asistido al menos una vez en los últimos 2 años, por motivo de su enfermedad rara: (puede marcar varias opciones)  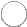 Alergología/Inmunología  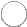 Cardiología  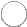 Consultas para el dolor  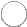 Dermatología  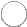 Endocrinología/Diabetes  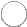 Estomatología/Odontología  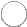 Gastroenterología  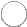 Genética  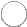 Geriatría  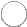 Ginecología / obstetricia  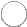 Hematología  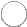 Medicina del hígado y páncreas  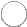 Medicina Interna  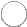 Nefrología  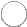 Neumología  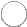 Neurología / epilepsia  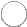 Nutrición/dietética  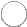 Oftalmología  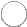 Oncología  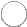 Ortopedia  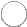 Otorrinolaringología  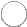 Pediatría general  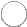 Podología  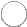 Psiquiatría  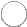 Rehabilitación  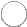 Reumatología  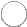 Servicios de urgencias  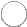 Unidad de enfermedades metabólicas  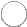 Urología  Otras especialidades médicas (especifique):  22. ¿Es atendido en un Centro, Servicio o Unidad de referencia (CSUR)?  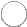 Complexo Hospitalario Universitario de Santiago (Galicia)  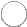 Hospital Universitario de Cruces-Gurutzetako unibertsitate ospitalea (País Vasco)  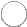 Hospital Universitari i Politècnic La Fe de Valencia (Comunidad Valenciana)  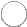 Hospital San Joan de Déu (Cataluña)  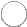 Hospital Universitari Vall D'Hebrón (Cataluña)  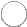 Hospital Universitario Ramón y Cajal (Comunidad de Madrid)  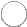 Hospital Universitario 12 de Octubre (Comunidad de Madrid)  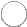 No, me atienden en otro hospital (especificar):  23. ¿Ha estado hospitalizado en los últimos 2 años debido a su enfermedad?  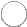 Sí, varias veces  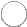 Sí, una vez  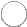 No  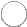 No sabe / No contesta  24. Indique las pruebas o exploraciones que le han realizado al menos una vez en los últimos 2 años, por motivo de su enfermedad (puede marcar varias opciones):  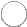 Análisis biológicos /bioquímicos (sangre, orina, etc.)  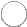 Audiometrías  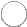 Biopsias / frotis / análisis citologías  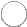 Ecografías  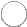 Electroencefalograma (EEG) / potenciales evocados  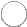 Electrocardiograma (ECG)  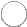 Electromiograma (EMG)  Estudio Doppler  Exploraciones funcionales (respiratorias, musculares)  Fibroscopias  Imágenes especializadas : escáner/ resonancias  Impedanciometrías  Microbiología (bacterias, virus, parásitos, hongos)  Radiología clásica (RX)  Vestibulometrías  Otras pruebas (especifique)  25. Por favor, indique por orden de importancia qué medicamentos y otros productos consume para el tratamiento de su enfermedad (ATENCIÓN: si no consume ninguno, indique NINGUNO en ambas casillas y pase a la pregunta 27)  MEDICAMENTOS:  OTROS PRODUCTOS (prótesis, cosméticos, materiales de cura, etc.):  26. ¿Ha tenido o tiene en la actualidad dificultades para el acceso a estos medicamentos?  Sí (especificar en comentarios)  No  No sabe/ No contesta  Si la respuesta es "Sí", especificar dificultades para el acceso al medicamento:  27. ¿En los últimos 2 años, usted o alguien en su lugar, se ha desplazado fuera de su provincia, para realizar diagnósticos, recibir tratamientos o acceder a la medicación que precisa?  Sí, 5 veces o más en los últimos 2 años  Sí, menos de 5 veces en los últimos 2 años  No he podido, aunque sí lo he necesitado (pase a la pregunta 29)  No, no lo he necesitado (pase a la pregunta 29)  No sabe / No contesta (pase a la pregunta 29)  28. Por favor, especifique el municipio o municipios al que usted se tuvo que desplazar para recibir tratamiento, realizar diagnóstico o acceder a la medicación:  29. ¿En general, está satisfecho/a con la atención sanitaria que recibe por motivo de su enfermedad?  Si  No  No sabe/ No contesta |

| D) GASTOS RELACIONADOS CON LA ENFERMEDAD |
| --- |
| 30. ¿Qué porcentaje de los ingresos del núcleo familiar (del total de ingresos del hogar) se destinan, por término medio, a gastos relacionados con la atención de la enfermedad (incluyendo tratamientos, especialidades, fármacos, alimentos dietéticos, etc.)?  Menos del 10% de los ingresos anuales  Entre el 10 y el 20% de los ingresos anuales Entre el 20 y el 30% de los ingresos anuales Entre el 30 y el 40% de los ingresos anuales Entre el 40 y el 50% de los ingresos anuales Más del 50% de los ingresos anuales  No sabe /No contesta  31. Por favor, señale a cuáles de las siguientes partidas se destinan los gastos por enfermedad mencionados en la pregunta anterior (puede marcar varias opciones)  Tratamiento médico/ atención sanitaria  Adquisición de medicamentos y otros productos sanitarios Ayudas técnicas/ ortopedia  Apoyo o asistencia personal Adaptación de vivienda  Transporte (incluyendo aquí la adaptación de su vehículo) Alimentos dietéticos/específicos para IHF  Otras partidas (especifique) |

| E) USO DE RECURSOS |
| --- |
| 32. ¿Acude y/o pertenece a alguna asociación de pacientes? (ya sea para personas con su misma enfermedad o que agrupe a diferentes enfermedades)  Sí, como socio Sí, como usuario  No (pase a la pregunta 35)  No sabe / No contesta (pase a la pregunta 35)  33. Especifique el nombre de la asociación a la que pertenece:    34. ¿Está satisfecho con los servicios y actividades que le ofrece dicha asociación?  Si  No  No sabe/No contesta  Especifique por qué está satisfecho o insatisfecho con los servicios y actividades de la asociación a la que pertenece: |

| F) PERCEPCIÓN DE SU SITUACIÓN ACTUAL |
| --- |
| 35. ¿Se ha sentido alguna vez discriminado/a por motivo de su enfermedad rara?  No, nuca  Alguna vez  A menudo  Continuamente  No sabe/No contesta  36. ¿En cuáles de los siguientes ámbitos se ha sentido alguna vez discriminado/a? (puede marcar varias opciones)  En la atención sanitaria  En la escuela, colegio, ámbito escolar o formativo (comedor escolar, etc.) En el puesto de trabajo  Para participar en actividades de ocio o culturales (restaurantes, campamentos, excursiones, etc.) En la vida cotidiana (compra, tareas domésticas, etc.)  Otros ámbitos (especifique)    37. Explicar brevemente los motivos de la discriminación:  38. ¿Qué aspectos podrían mejorar en mayor medida su situación actual? (puede marcar varias opciones)  Mejor atención sanitaria  Mayor conocimiento/formación de los profesionales sanitarios  Mayor investigación sobre la enfermedad  Disponer de medicamentos para la enfermedad  Alimentos específicos (dietéticos) para la enfermedad  Mejor etiquetado de alimentos  Ayudas económicas para la compra de alimentos dietéticos  Otros (especifique)  39. Con respecto a los medicamentos, ¿qué medidas podrían mejorar en mayor medida su situación actual? (puede marcar varias opciones)  Información más clara y accesible sobre excipientes permitidos y no permitidos  Mayor número de medicamentos con excipientes permitidos  Mayor facilidad para la búsqueda de medicamentos aptos  Mayor conocimiento de profesionales sanitarios sobre medicamentos aptos/no aptos  Otras medidas (especifique):  40. De las siguientes fuentes, ¿cuál es más fiable para obtener información de su enfermedad? (puede marcar varias opciones):  Médico especialista del hospital  Médico de atención primaria (ambulatorio)  Farmacéutico  Personal de enfermería  Dietista/Nutricionista  Otros profesionales sanitarios (especificar en comentarios)  Asociaciones de pacientes  Internet  Redes sociales  Televisión, radio o noticias en periódicos  Otras fuentes (especifique): |

| ENCUESTA DE CALIDAD DE VIDA |
| --- |
| **Se le van a hacer 5 preguntas sobre su calidad de vida, debido a que las encuestas de calidad de vida son diferentes en niños (menores de 18 años) y adultos (mayores o igual a 18 años), especifique si el afectado es niño o adulto (Recuerde que las preguntas se refieren exclusivamente a la persona con IHF):**  41. El afectado es:  Adulto (mayor o igual a 18 años) Niño (menor de 18 años)  **ENCUESTA DE CALIDAD DE VIDA ADULTO (mayor o igual a 18 años):**  Marque la respuesta de cada apartado que mejor describa su estado de salud en el día de HOY:  42. Movilidad  No tengo problemas para caminar  Tengo algunos problemas para caminar  Tengo que estar en la cama  43. Cuidado personal  No tengo problemas con el cuidado personal  Tengo algunos problemas para lavarme o vestirme  Soy incapaz de lavarme o vestirme  44. Actividades cotidianas (por ejemplo trabajar, estudiar, hacer las tareas domésticas, actividades familiares o actividades durante el tiempo libre)  No tengo problemas para realizar mis actividades cotidianas  Tengo algunos problemas para realizar mis actividades cotidianas  Soy incapaz de realizar mis actividades cotidianas  45. Dolor/malestar  No tengo dolor ni malestar  Tengo moderado dolor o malestar  Tengo mucho dolor o malestar  46. Ansiedad/depresión  No estoy ansioso ni deprimido  Estoy moderadamente ansioso o deprimido  Estoy muy ansioso o deprimido  47. Para ayudar a la gente a describir lo bueno o malo que es su estado de salud hemos dibujado una escala parecida a un termómetro en el cual se marca con un 100 el mejor estado de salud que pueda imaginarse y con un 0 el peor estado de salud que pueda imaginarse. Por favor, indique el punto del termómetro que en su opinión indique lo bueno o malo que es su estado de salud en el día de HOY.  PONGA ESE NÚMERO (DEL 1 AL 100) EN EL SIGUIENTE RECUADRO:      **ENCUESTA CALIDAD DE VIDA NIÑO O ADOLESCENTE (menores de 18 años):**  Marca la casilla que describe mejor tu estado de salud HOY:  48. Moverse (al caminar)  No tengo problemas al caminar  Tengo algunos problemas al caminar  Tengo muchos problemas al caminar  49. Cuidar de mí mismo  No tengo problemas para lavarme o vestirme solo  Tengo algunos problemas para lavarme y vestirme solo  Tengo muchos problemas para lavarme y vestirme solo  50. Hacer actividades habituales (ej., ir al colegio, al hacer deporte, al jugar, al hacer actividades con la familia o los amigos)  No tengo problemas al hacer mis actividades habituales  Tengo algunos problemas al hacer mis actividades habituales  Tengo muchos problemas al hacer mis actividades habituales  51. Tengo dolor o sentirme mal  No tengo dolor ni me siento mal  Tengo algo de dolor o me siento mal  Tengo mucho dolor o malestar  52. Sentirse preocupado, triste o infeliz  No me siento preocupado, triste o infeliz  Me siento un poco preocupado, triste o infeliz  Me siento muy preocupado, triste o infeliz  53. Para ayudarnos a conocer lo bueno o malo que es tu estado de salud HOY hemos dibujado una escala parecida a un termómetro de 0 a 100. Ten en cuenta que el 0 representa el peor estado de salud que puedas imaginar y 100 representa el mejor estado de salud. Por favor, indica lo bueno o malo que es tu estado de salud en el día de HOY.  PON ESE NÚMERO (DEL 1 AL 100) EN EL SIGUIENTE RECUADRO: |

| Comentarios: |
| --- |
| 54. Muchas gracias por rellenar el cuestionario. Si desea añadir algún comentario puede hacerlo en el espacio que aparece a continuación. |
